# Supplementary material
Source: MDPI journal article supplement (https://www.mdpi.com/2304-6740/6/3/97)

# checkCIF/PLATON report

Structure factors have been supplied for datablock(s) A1

THIS REPORT IS FOR GUIDANCE ONLY. IF USED AS PART OF A REVIEW PROCEDURE FOR PUBLICATION, IT SHOULD NOT REPLACE THE EXPERTISE OF AN EXPERIENCED CRYSTALLOGRAPHIC REFEREE.

No syntax errors found.      CIF dictionary      Interpreting this report

## Datablock: A1

---

Bond precision:    C-C = 0.0203 Å

Wavelength=0.71073

Cell:                a=16.0557(11)        b=20.7694(15)        c=21.3136(14)  
                      alpha=115.639(5)    beta=98.267(5)     gamma=101.194(6)  
Temperature:    203 K

|                        | Calculated                                   | Reported                                    |
|------------------------|----------------------------------------------|---------------------------------------------|
| Volume                 | 6073.6(8)                                    | 6073.6(8)                                   |
| Space group            | P -1                                         | P -1                                        |
| Hall group             | -P 1                                         | -P 1                                        |
| Moiety formula         | C100 H88 N4 O8 Ru4, 4(C F3 O3 S), 4(C3 H6 O) | C100 H88 N4 O12 Ru4, 4 C F3 S O3, 4 C3 H6 O |
| Sum formula            | C116 H112 F12 N4 O24 Ru4 S4                  | C116 H112 F12 N4 O24 Ru4 S4                 |
| Mr                     | 2706.62                                      | 2706.61                                     |
| Dx, g cm <sup>-3</sup> | 1.480                                        | 1.480                                       |
| Z                      | 2                                            | 2                                           |
| Mu (mm <sup>-1</sup> ) | 0.644                                        | 0.644                                       |
| F000                   | 2752.0                                       | 2752.0                                      |
| F000'                  | 2744.34                                      |                                             |
| h,k,lmax               | 22,28,29                                     | 22,28,29                                    |
| Nref                   | 33302                                        | 32944                                       |
| Tmin,Tmax              | 0.870,0.914                                  |                                             |
| Tmin'                  | 0.851                                        |                                             |

Correction method= Not given

Data completeness= 0.989

Theta(max)= 29.328

R(reflections)= 0.0911( 9666)

wR2(reflections)= 0.2939( 32944)

S = 0.836

Npar= 1113

---

The following ALERTS were generated. Each ALERT has the format

**test-name\_ALERT\_alert-type\_alert-level.**

Click on the hyperlinks for more details of the test.

---

### Alert level A

SHFSU01\_ALERT\_2\_A The absolute value of parameter shift to su ratio > 0.20  
Absolute value of the parameter shift to su ratio given 0.983  
Additional refinement cycles may be required.

|                   |                                                    |      |       |
|-------------------|----------------------------------------------------|------|-------|
| PLAT026_ALERT_3_A | Ratio Observed / Unique Reflections (too) Low ..   | 29%  | Check |
| PLAT080_ALERT_2_A | Maximum Shift/Error .....                          | 0.98 | Why ? |
| PLAT234_ALERT_4_A | Large Hirshfeld Difference C83 --C84               | 0.32 | Ang.  |
| PLAT234_ALERT_4_A | Large Hirshfeld Difference F4 --C102               | 0.32 | Ang.  |
| PLAT413_ALERT_2_A | Short Inter XH3 .. XHn H10J ..H11H                 | 1.86 | Ang.  |
| PLAT602_ALERT_2_A | VERY LARGE Solvent Accessible VOID(S) in Structure | !    | Info  |

---

### Alert level B

|                   |                                                    |         |      |
|-------------------|----------------------------------------------------|---------|------|
| PLAT230_ALERT_2_B | Hirshfeld Test Diff for C97 --C99                  | 8.7     | s.u. |
| PLAT234_ALERT_4_B | Large Hirshfeld Difference S1 --C101               | 0.30    | Ang. |
| PLAT234_ALERT_4_B | Large Hirshfeld Difference F5 --C102               | 0.26    | Ang. |
| PLAT234_ALERT_4_B | Large Hirshfeld Difference F7 --C103               | 0.28    | Ang. |
| PLAT234_ALERT_4_B | Large Hirshfeld Difference F10 --C104              | 0.28    | Ang. |
| PLAT234_ALERT_4_B | Large Hirshfeld Difference F12 --C104              | 0.26    | Ang. |
| PLAT241_ALERT_2_B | High 'MainMol' Ueq as Compared to Neighbors of C83 | Check   |      |
| PLAT342_ALERT_3_B | Low Bond Precision on C-C Bonds .....              | 0.02026 | Ang. |
| PLAT413_ALERT_2_B | Short Inter XH3 .. XHn H10K ..H11H                 | 1.99    | Ang. |
| PLAT413_ALERT_2_B | Short Inter XH3 .. XHn H10L ..H11H                 | 1.96    | Ang. |

---

### Alert level C

RINTA01\_ALERT\_3\_C The value of Rint is greater than 0.12  
Rint given 0.150

|                   |                                                |       |        |
|-------------------|------------------------------------------------|-------|--------|
| PLAT020_ALERT_3_C | The Value of Rint is Greater Than 0.12 .....   | 0.150 | Report |
| PLAT084_ALERT_3_C | High wR2 Value (i.e. > 0.25) .....             | 0.29  | Report |
| PLAT213_ALERT_2_C | Atom C83 has ADP max/min Ratio .....           | 3.9   | prolat |
| PLAT213_ALERT_2_C | Atom C96 has ADP max/min Ratio .....           | 3.8   | prolat |
| PLAT220_ALERT_2_C | Non-Solvent Resd 1 C Ueq(max)/Ueq(min) Range   | 5.2   | Ratio  |
| PLAT222_ALERT_3_C | Non-Solv. Resd 1 H Uiso(max)/Uiso(min) Range   | 5.9   | Ratio  |
| PLAT230_ALERT_2_C | Hirshfeld Test Diff for C67 --C68              | 6.9   | s.u.   |
| PLAT230_ALERT_2_C | Hirshfeld Test Diff for C71 --C77              | 6.5   | s.u.   |
| PLAT230_ALERT_2_C | Hirshfeld Test Diff for C77 --C79              | 5.3   | s.u.   |
| PLAT230_ALERT_2_C | Hirshfeld Test Diff for C87 --C89              | 5.7   | s.u.   |
| PLAT230_ALERT_2_C | Hirshfeld Test Diff for C97 --C98              | 5.1   | s.u.   |
| PLAT234_ALERT_4_C | Large Hirshfeld Difference C12 --C13           | 0.18  | Ang.   |
| PLAT234_ALERT_4_C | Large Hirshfeld Difference C61 --C66           | 0.18  | Ang.   |
| PLAT234_ALERT_4_C | Large Hirshfeld Difference C63 --C64           | 0.21  | Ang.   |
| PLAT234_ALERT_4_C | Large Hirshfeld Difference C67 --C69           | 0.19  | Ang.   |
| PLAT234_ALERT_4_C | Large Hirshfeld Difference C81 --C87           | 0.17  | Ang.   |
| PLAT234_ALERT_4_C | Large Hirshfeld Difference C82 --C83           | 0.24  | Ang.   |
| PLAT234_ALERT_4_C | Large Hirshfeld Difference C93 --C94           | 0.16  | Ang.   |
| PLAT234_ALERT_4_C | Large Hirshfeld Difference C95 --C96           | 0.21  | Ang.   |
| PLAT242_ALERT_2_C | Low 'MainMol' Ueq as Compared to Neighbors of  | Ru1   | Check  |
| PLAT242_ALERT_2_C | Low 'MainMol' Ueq as Compared to Neighbors of  | Ru3   | Check  |
| PLAT242_ALERT_2_C | Low 'MainMol' Ueq as Compared to Neighbors of  | C67   | Check  |
| PLAT242_ALERT_2_C | Low 'MainMol' Ueq as Compared to Neighbors of  | C87   | Check  |
| PLAT242_ALERT_2_C | Low 'MainMol' Ueq as Compared to Neighbors of  | C97   | Check  |
| PLAT243_ALERT_4_C | High 'Solvent' Ueq as Compared to Neighbors of | C101  | Check  |
| PLAT243_ALERT_4_C | High 'Solvent' Ueq as Compared to Neighbors of | C102  | Check  |
| PLAT243_ALERT_4_C | High 'Solvent' Ueq as Compared to Neighbors of | C103  | Check  |
| PLAT243_ALERT_4_C | High 'Solvent' Ueq as Compared to Neighbors of | C104  | Check  |

|                   |                                                 |                                            |        |       |
|-------------------|-------------------------------------------------|--------------------------------------------|--------|-------|
| PLAT244_ALERT_4_C | Low                                             | 'Solvent' Ueq as Compared to Neighbors of  | S1     | Check |
| PLAT244_ALERT_4_C | Low                                             | 'Solvent' Ueq as Compared to Neighbors of  | S2     | Check |
| PLAT244_ALERT_4_C | Low                                             | 'Solvent' Ueq as Compared to Neighbors of  | S3     | Check |
| PLAT244_ALERT_4_C | Low                                             | 'Solvent' Ueq as Compared to Neighbors of  | S4     | Check |
| PLAT244_ALERT_4_C | Low                                             | 'Solvent' Ueq as Compared to Neighbors of  | C105   | Check |
| PLAT244_ALERT_4_C | Low                                             | 'Solvent' Ueq as Compared to Neighbors of  | C108   | Check |
| PLAT244_ALERT_4_C | Low                                             | 'Solvent' Ueq as Compared to Neighbors of  | C111   | Check |
| PLAT244_ALERT_4_C | Low                                             | 'Solvent' Ueq as Compared to Neighbors of  | C114   | Check |
| PLAT250_ALERT_2_C | Large                                           | U3/U1 Ratio for Average U(i,j) Tensor .... | 2.8    | Note  |
| PLAT250_ALERT_2_C | Large                                           | U3/U1 Ratio for Average U(i,j) Tensor .... | 2.9    | Note  |
| PLAT250_ALERT_2_C | Large                                           | U3/U1 Ratio for Average U(i,j) Tensor .... | 2.8    | Note  |
| PLAT250_ALERT_2_C | Large                                           | U3/U1 Ratio for Average U(i,j) Tensor .... | 2.9    | Note  |
| PLAT360_ALERT_2_C | Short                                           | C(sp3)-C(sp3) Bond C67 - C69 .             | 1.37   | Ang.  |
| PLAT434_ALERT_2_C | Short                                           | Inter HL..HL Contact F8 ..F10              | 2.50   | Ang.  |
| PLAT790_ALERT_4_C | Centre of Gravity not Within Unit Cell: Resd. # |                                            | 1      | Note  |
|                   |                                                 | C100 H88 N4 O8 Ru4                         |        |       |
| PLAT906_ALERT_3_C | Large                                           | K Value in the Analysis of Variance .....  | 81.107 | Check |
| PLAT906_ALERT_3_C | Large                                           | K Value in the Analysis of Variance .....  | 12.950 | Check |
| PLAT906_ALERT_3_C | Large                                           | K Value in the Analysis of Variance .....  | 4.678  | Check |
| PLAT906_ALERT_3_C | Large                                           | K Value in the Analysis of Variance .....  | 2.454  | Check |
| PLAT976_ALERT_2_C | Check                                           | Calcd Resid. Dens. 0.43A From O11          | -0.71  | eA-3  |
| PLAT976_ALERT_2_C | Check                                           | Calcd Resid. Dens. 0.66A From O20          | -0.69  | eA-3  |
| PLAT976_ALERT_2_C | Check                                           | Calcd Resid. Dens. 1.06A From O21          | -0.62  | eA-3  |
| PLAT978_ALERT_2_C | Number                                          | C-C Bonds with Positive Residual Density.  | 0      | Info  |

## ● Alert level G

FORMU01\_ALERT\_1\_G There is a discrepancy between the atom counts in the  
   \_chemical\_formula\_sum and \_chemical\_formula\_moiety. This is  
   usually due to the moiety formula being in the wrong format.  
   Atom count from \_chemical\_formula\_sum: C116 H112 F12 N4 O24 Ru4 S4  
   Atom count from \_chemical\_formula\_moiety:C116 H112 F12 N4 O28 Ru4 S4

|                   |                                                  |        |        |
|-------------------|--------------------------------------------------|--------|--------|
| PLAT042_ALERT_1_G | Calc. and Reported MoietyFormula Strings Differ  | Please | Check  |
| PLAT072_ALERT_2_G | SHELXL First Parameter in WGHT Unusually Large   | 0.14   | Report |
| PLAT171_ALERT_4_G | The CIF-Embedded .res File Contains EADP Records | 8      | Report |
| PLAT231_ALERT_4_G | Hirshfeld Test (Solvent) S1 --O10 .              | 5.6    | s.u.   |
| PLAT231_ALERT_4_G | Hirshfeld Test (Solvent) S1 --O11 .              | 14.6   | s.u.   |
| PLAT231_ALERT_4_G | Hirshfeld Test (Solvent) F3 --C101 .             | 8.0    | s.u.   |
| PLAT231_ALERT_4_G | Hirshfeld Test (Solvent) S2 --O12 .              | 10.5   | s.u.   |
| PLAT231_ALERT_4_G | Hirshfeld Test (Solvent) S2 --O13 .              | 5.2    | s.u.   |
| PLAT231_ALERT_4_G | Hirshfeld Test (Solvent) S2 --O14 .              | 12.0   | s.u.   |
| PLAT231_ALERT_4_G | Hirshfeld Test (Solvent) S2 --C102 .             | 8.0    | s.u.   |
| PLAT231_ALERT_4_G | Hirshfeld Test (Solvent) F6 --C102 .             | 5.5    | s.u.   |
| PLAT231_ALERT_4_G | Hirshfeld Test (Solvent) S3 --O15 .              | 14.7   | s.u.   |
| PLAT231_ALERT_4_G | Hirshfeld Test (Solvent) S3 --O17 .              | 9.8    | s.u.   |
| PLAT231_ALERT_4_G | Hirshfeld Test (Solvent) S3 --C103 .             | 7.5    | s.u.   |
| PLAT231_ALERT_4_G | Hirshfeld Test (Solvent) S4 --O18 .              | 11.3   | s.u.   |
| PLAT231_ALERT_4_G | Hirshfeld Test (Solvent) S4 --O19 .              | 16.3   | s.u.   |
| PLAT231_ALERT_4_G | Hirshfeld Test (Solvent) S4 --O20 .              | 26.3   | s.u.   |
| PLAT231_ALERT_4_G | Hirshfeld Test (Solvent) S4 --C104 .             | 9.0    | s.u.   |
| PLAT231_ALERT_4_G | Hirshfeld Test (Solvent) F11 --C104 .            | 5.5    | s.u.   |
| PLAT371_ALERT_2_G | Long C(sp2)-C(sp1) Bond C8 - C10 .               | 1.43   | Ang.   |
| PLAT371_ALERT_2_G | Long C(sp2)-C(sp1) Bond C19 - C26 .              | 1.43   | Ang.   |
| PLAT371_ALERT_2_G | Long C(sp2)-C(sp1) Bond C36 - C38 .              | 1.41   | Ang.   |
| PLAT371_ALERT_2_G | Long C(sp2)-C(sp1) Bond C39 - C40 .              | 1.41   | Ang.   |
| PLAT371_ALERT_2_G | Long C(sp2)-C(sp1) Bond C47 - C54 .              | 1.41   | Ang.   |
| PLAT380_ALERT_4_G | Incorrectly? Oriented X(sp2)-Methyl Moiety ..... | C115   | Check  |
| PLAT432_ALERT_2_G | Short Inter X...Y Contact O17 ..C3               | 2.83   | Ang.   |
| PLAT432_ALERT_2_G | Short Inter X...Y Contact O17 ..C4               | 2.91   | Ang.   |
| PLAT432_ALERT_2_G | Short Inter X...Y Contact O20 ..C82              | 3.00   | Ang.   |
| PLAT432_ALERT_2_G | Short Inter X...Y Contact O20 ..C33              | 3.02   | Ang.   |

|                                                                                |             |
|--------------------------------------------------------------------------------|-------------|
| PLAT432_ALERT_2_G Short Inter X...Y Contact C109 ..C113                        | 2.94 Ang.   |
| PLAT790_ALERT_4_G Centre of Gravity not Within Unit Cell: Resd. #<br>C F3 O3 S | 2 Note      |
| PLAT790_ALERT_4_G Centre of Gravity not Within Unit Cell: Resd. #<br>C F3 O3 S | 3 Note      |
| PLAT790_ALERT_4_G Centre of Gravity not Within Unit Cell: Resd. #<br>C F3 O3 S | 4 Note      |
| PLAT790_ALERT_4_G Centre of Gravity not Within Unit Cell: Resd. #<br>C F3 O3 S | 5 Note      |
| PLAT790_ALERT_4_G Centre of Gravity not Within Unit Cell: Resd. #<br>C3 H6 O   | 7 Note      |
| PLAT790_ALERT_4_G Centre of Gravity not Within Unit Cell: Resd. #<br>C3 H6 O   | 8 Note      |
| PLAT790_ALERT_4_G Centre of Gravity not Within Unit Cell: Resd. #<br>C3 H6 O   | 9 Note      |
| PLAT908_ALERT_2_G Max. Perc. Data with I > 2*s(I) per Res.Shell .              | 71.36% Note |
| PLAT910_ALERT_3_G Missing # of FCF Reflection(s) Below Theta(Min).             | 4 Note      |
| PLAT912_ALERT_4_G Missing # of FCF Reflections Above STh/L= 0.600              | 356 Note    |

---

7 **ALERT level A** = Most likely a serious problem - resolve or explain  
 10 **ALERT level B** = A potentially serious problem, consider carefully  
 52 **ALERT level C** = Check. Ensure it is not caused by an omission or oversight  
 41 **ALERT level G** = General information/check it is not something unexpected

2 ALERT type 1 CIF construction/syntax error, inconsistent or missing data  
 43 ALERT type 2 Indicator that the structure model may be wrong or deficient  
 11 ALERT type 3 Indicator that the structure quality may be low  
 54 ALERT type 4 Improvement, methodology, query or suggestion  
 0 ALERT type 5 Informative message, check

---

It is advisable to attempt to resolve as many as possible of the alerts in all categories. Often the minor alerts point to easily fixed oversights, errors and omissions in your CIF or refinement strategy, so attention to these fine details can be worthwhile. In order to resolve some of the more serious problems it may be necessary to carry out additional measurements or structure refinements. However, the purpose of your study may justify the reported deviations and the more serious of these should normally be commented upon in the discussion or experimental section of a paper or in the "special\_details" fields of the CIF. checkCIF was carefully designed to identify outliers and unusual parameters, but every test has its limitations and alerts that are not important in a particular case may appear. Conversely, the absence of alerts does not guarantee there are no aspects of the results needing attention. It is up to the individual to critically assess their own results and, if necessary, seek expert advice.

### Publication of your CIF in IUCr journals

A basic structural check has been run on your CIF. These basic checks will be run on all CIFs submitted for publication in IUCr journals (*Acta Crystallographica*, *Journal of Applied Crystallography*, *Journal of Synchrotron Radiation*); however, if you intend to submit to *Acta Crystallographica Section C* or *E* or *IUCrData*, you should make sure that full publication checks are run on the final version of your CIF prior to submission.

### Publication of your CIF in other journals

Please refer to the *Notes for Authors* of the relevant journal for any special instructions relating to CIF submission.

Datablock A1 - ellipsoid plot

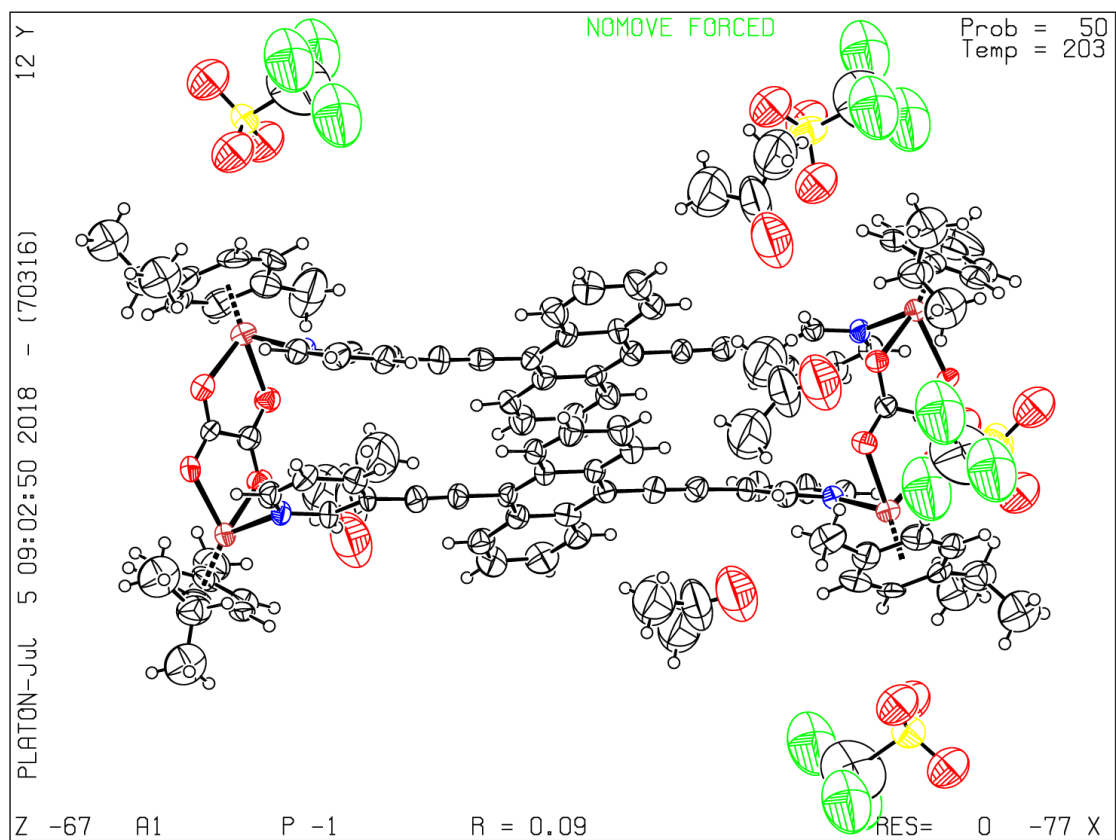

Supplement: s1 [file s1]
